# Supplementary material
Source: publisher site journal article supplement (http://www.kjim.org/upload/media/kjim-2023-193-Supplementary-Table-4.pdf)
Supplement: Supplementary file 1 [file kjim-2023-193-Supplementary-Table-4.pdf]

**Supplementary Table 4. Risk factors of mortality in RA patients with microbiologically confirmed NTM-PD (n = 35)**

| Variable                                                  | Crude HR (95% CI)   | p value |
|-----------------------------------------------------------|---------------------|---------|
| <b>Comorbidities</b>                                      |                     |         |
| Diabetes mellitus                                         | 0.45 (0.05–3.84)    | 0.461   |
| Hypertension                                              | 0.78 (0.15–3.96)    | 0.760   |
| Cardiovascular disease                                    | 0.35 (0.04–2.89)    | 0.327   |
| History of tuberculosis                                   | 1.54 (0.31–7.66)    | 0.598   |
| COPD                                                      | 4.41 (0.61–32.07)   | 0.143   |
| ILD                                                       | 0.89 (0.22–3.62)    | 0.868   |
| <b>Social history</b>                                     |                     |         |
| Smoking                                                   | 2.63 (0.52–13.32)   | 0.242   |
| <b>Medications</b>                                        |                     |         |
| Corticosteroid                                            | 1.53 (0.30–7.76)    | 0.608   |
| Hydroxychloroquine                                        | 1.32 (0.15–11.33)   | 0.799   |
| Sulfasalazine                                             | 1.26 (0.30–5.30)    | 0.755   |
| Leflunomide                                               | 0.80 (0.19–3.35)    | 0.755   |
| bDMARDs                                                   | 2.85 (0.40–20.30)   | 0.297   |
| Chest CT (nodular/bronchiectatic with fibrocavitary form) | 12.16 (1.21–121.98) | 0.034   |

bDMARDs, biologic disease modifying anti-rheumatic drugs; CI, confidence interval; COPD, chronic obstructive pulmonary disease; CT, computed tomography; HR, hazard ratio; ILD, interstitial lung disease; NTM-PD, non-tuberculous mycobacterial pulmonary disease; RA, rheumatoid arthritis.

The risk factors for mortality were evaluated using Cox regression analysis.
